# Supplementary material for: Apricot Kernel Extract and Amygdalin Inhibit Urban Particulate Matter-Induced Keratoconjunctivitis Sicca
Source: Molecules. 2019 Feb 12;24(3):650. doi: 10.3390/molecules24030650 (PMC6384987; doi:10.3390/molecules24030650)
Supplement: Supplementary file 1 [file molecules-24-00650-s001.pdf]

Article

# Apricot Kernel Extract and Amygdalin Inhibit Urban Particulate Matter-Induced Keratoconjunctivitis Sicca

Soo-Wang Hyun <sup>1,†</sup>, Junghyun Kim <sup>2,†</sup>, Bongkyun Park <sup>3</sup>, Kyuhyung Jo <sup>3</sup>, Tae Gu Lee <sup>3</sup>, Jin Sook Kim <sup>1</sup> and Chan-Sik Kim <sup>3,4,\*</sup>

Supplementary Materials:

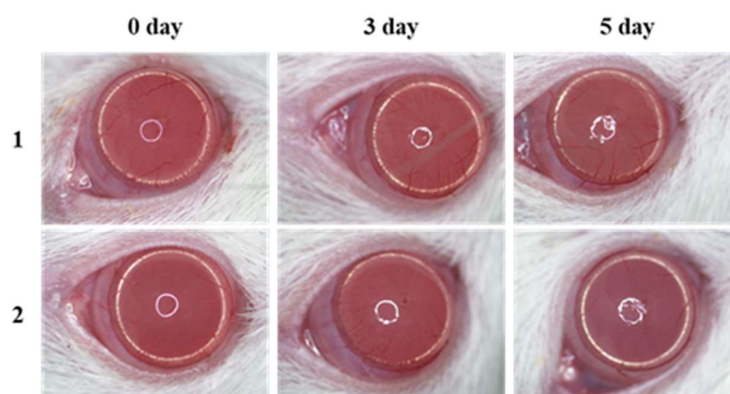

**Figure S1. The time series of change in corneal irregularity.** Representative reflected images of a white ring from the fiber-optic ring illuminator of the stereomicroscope. The images were taken 0, 3, and 5 days after exposure to urban particulate matter.
